# Supplementary material for: The ProQOL-21: A revised version of the Professional Quality of Life (ProQOL) scale based on Rasch analysis
Source: PLoS One. 2018 Feb 28;13(2):e0193478. doi: 10.1371/journal.pone.0193478 (PMC5831102; doi:10.1371/journal.pone.0193478)
Supplement: S1 Syntax — To assist users of SPSS Statistics with transforming the coding of their existing ProQOL datasets to employ the revised response categories and subscale scores outlined in this article, this syntax file recodes items and provides subscale scores accordingly. Note that the syntax is provided as-is for researchers and practitioners to use, and we recommend that users should retain a copy of their original data prior to recoding. (SPS) [file pone.0193478.s003.sps]

* Encoding: UTF-8.
/* ProQOL-21 recoding syntax for SPSS.

/* Press 'Run' > 'All' from the menu options above this syntax to run it on your data file.

/* **Data File Setup - Please check this first**
/* Note that your ProQOL variable names must match those listed below. Copy and paste the following variable names into your
/* data file via the Variable View mode, to replace the original variable labels you may have had previously. The list below assumes 
/* that you have ordered your ProQOL variables from item 1 to item 30. There is no need to worry about reverse coding some of the 
/* Burnout subscale items, as the modified scale does not involve them. 
 * 
ProQoL1BO
ProQoL2STS
ProQoL3CS
ProQoL4BO
ProQoL5STS
ProQoL6CS
ProQoL7STS
ProQoL8BO
ProQoL9STS
ProQoL10BO
ProQoL11STS
ProQoL12CS
ProQoL13STS
ProQoL14STS
ProQoL15BO
ProQoL16CS
ProQoL17BO
ProQoL18CS
ProQoL19BO
ProQoL20CS
ProQoL21BO
ProQoL22CS
ProQoL23STS
ProQoL24CS
ProQoL25STS
ProQoL26BO
ProQoL27CS
ProQoL28STS
ProQoL29BO
ProQoL30CS

/* Note that the recodings below will only work for whole numbers that follow the original 1 to 5 response approach. If you have
/* used a data replacement method to address missing data (e.g., mean substitution), then the syntax below will not pick up
/* the non-whole numbers the data replacement method has likely calculated for your data file. If you decide to replace missing
/* data, we would therefore recommend performing this process after the recoding has been conducted.

RECODE ProQoL6CS ProQoL16CS ProQoL18CS ProQoL20CS ProQoL22CS ProQoL30CS (1=1) (2=1) (3=2) (4=3) 
    (5=4) (MISSING=SYSMIS).
EXECUTE.

RECODE ProQoL3CS ProQoL12CS ProQoL24CS ProQoL27CS (1=1) (2=1) (MISSING=SYSMIS) (3=1) (4=2) (5=3).
EXECUTE.

RECODE ProQoL26BO (1=1) (3=2) (4=3) (5=3) (2=2) (MISSING=SYSMIS).
EXECUTE.

RECODE ProQoL23STS (1=1) (MISSING=SYSMIS) (2=2) (3=3) (4=3) (5=3).
EXECUTE.

RECODE ProQoL8BO ProQoL10BO ProQoL11STS ProQoL14STS ProQoL25STS (MISSING=SYSMIS) (1=1) (2=2) (3=3) 
    (4=4) (5=4).
EXECUTE.

/* The following part of the syntax will create two total score variables in your data; one for Compassion Satisfaction, the other for
/* Compassion Fatigue. Scores on this variable can be compared against the Table in the article for a normed score / percentile
/* interpretation.

COMPUTE CS_RecodeTotal=ProQoL30CS + ProQoL3CS + ProQoL22CS + ProQoL16CS + ProQoL20CS + ProQoL24CS + 
    ProQoL18CS + ProQoL6CS + ProQoL12CS + ProQoL27CS.
VARIABLE LABELS  CS_RecodeTotal 'Compassion Satisfaction total score PQL-21'.
EXECUTE.

COMPUTE CF_RecodeTotal=ProQoL26BO + ProQoL21BO + ProQoL19BO + ProQoL23STS + ProQoL10BO + 
    ProQoL11STS + ProQoL9STS + ProQoL8BO + ProQoL14STS + ProQoL25STS + ProQoL13STS.
VARIABLE LABELS  CF_RecodeTotal 'Compassion Fatigue total score PQL-21'.
EXECUTE.
