# Supplementary material for: The ProQOL-21: A revised version of the Professional Quality of Life (ProQOL) scale based on Rasch analysis
Source: PLoS One. 2018 Feb 28;13(2):e0193478. doi: 10.1371/journal.pone.0193478 (PMC5831102; doi:10.1371/journal.pone.0193478)
Supplement: S1 Table — Bivariate correlations reflect Pearson’s r coefficients. Item numbers reflect numbering from ProQOL instrument manual [1]. CS = Compassion Satisfaction. BO = Burnout. STS = Secondary Traumatic Stress. M = sample mean, SD = standard deviation. * p < .05. ** p < .01. (DOCX) [file pone.0193478.s001.docx]

| Item | 3CS | 6CS | 12CS | 16CS | 18CS | 20CS | 22CS | 24CS | 27CS | 30CS | 1BO | 4BO | 8BO | 10BO | 15BO | 17BO | 19BO | 21BO | 26BO | 29BO | 2STS | 5STS | 7STS | 9STS | 11STS | 13STS | 14STS | 23STS | 25STS | 28STS |
| --- | --- | --- | --- | --- | --- | --- | --- | --- | --- | --- | --- | --- | --- | --- | --- | --- | --- | --- | --- | --- | --- | --- | --- | --- | --- | --- | --- | --- | --- | --- |
| 6CS | .519** |  |  |  |  |  |  |  |  |  |  |  |  |  |  |  |  |  |  |  |  |  |  |  |  |  |  |  |  |  |
| 12CS | .524** | .422** |  |  |  |  |  |  |  |  |  |  |  |  |  |  |  |  |  |  |  |  |  |  |  |  |  |  |  |  |
| 16CS | .426** | .414** | .468** |  |  |  |  |  |  |  |  |  |  |  |  |  |  |  |  |  |  |  |  |  |  |  |  |  |  |  |
| 18CS | .456** | .401** | .469** | .470** |  |  |  |  |  |  |  |  |  |  |  |  |  |  |  |  |  |  |  |  |  |  |  |  |  |  |
| 20CS | .530** | .477** | .463** | .490** | .520** |  |  |  |  |  |  |  |  |  |  |  |  |  |  |  |  |  |  |  |  |  |  |  |  |  |
| 22CS | .528** | .429** | .477** | .491** | .547** | .561** |  |  |  |  |  |  |  |  |  |  |  |  |  |  |  |  |  |  |  |  |  |  |  |  |
| 24CS | .561** | .455** | .489** | .495** | .528** | .573** | .646** |  |  |  |  |  |  |  |  |  |  |  |  |  |  |  |  |  |  |  |  |  |  |  |
| 27CS | .381** | .408** | .365** | .433** | .427** | .430** | .478** | .488** |  |  |  |  |  |  |  |  |  |  |  |  |  |  |  |  |  |  |  |  |  |  |
| 30CS | .528** | .419** | .553** | .500** | .621** | .535** | .537** | .571** | .391** |  |  |  |  |  |  |  |  |  |  |  |  |  |  |  |  |  |  |  |  |  |
| 1BO | .484** | .407** | .408** | .403** | .475** | .446** | .406** | .439** | .329** | .424** |  |  |  |  |  |  |  |  |  |  |  |  |  |  |  |  |  |  |  |  |
| 4BO | .578** | .487** | .406** | .453** | .458** | .458** | .458** | .481** | .398** | .441** | .551** |  |  |  |  |  |  |  |  |  |  |  |  |  |  |  |  |  |  |  |
| 8BO | -.125** | -.069* | -.121** | -.167** | -.176** | -.124** | -.149** | -.137** | -.091** | -.159** | -.357** | -.169** |  |  |  |  |  |  |  |  |  |  |  |  |  |  |  |  |  |  |
| 10BO | -.336** | -.251** | -.358** | -.303** | -.403** | -.295** | -.310** | -.338** | -.201** | -.448** | -.445** | -.295** | .474** |  |  |  |  |  |  |  |  |  |  |  |  |  |  |  |  |  |
| 15BO | .272** | .290** | .306** | .385** | .243** | .304** | .280** | .296** | .287** | .286** | .235** | .255** | -.028 | -.080** |  |  |  |  |  |  |  |  |  |  |  |  |  |  |  |  |
| 17BO | .411** | .373** | .390** | .511** | .578** | .501** | .437** | .470** | .445** | .495** | .552** | .492** | -.231** | -.387** | .297** |  |  |  |  |  |  |  |  |  |  |  |  |  |  |  |
| 19BO | -.162** | -.165** | -.183** | -.241** | -.276** | -.247** | -.195** | -.166** | -.105** | -.297** | -.336** | -.191** | .329** | .471** | -.045 | -.299** |  |  |  |  |  |  |  |  |  |  |  |  |  |  |
| 21BO | -.153** | -.178** | -.197** | -.237** | -.278** | -.210** | -.195** | -.159** | -.106** | -.233** | -.354** | -.200** | .346** | .395** | -.064* | -.266** | .599** |  |  |  |  |  |  |  |  |  |  |  |  |  |
| 26BO | -.178** | -.151** | -.196** | -.260** | -.412** | -.252** | -.236** | -.228** | -.095** | -.339** | -.358** | -.250** | .290** | .455** | -.028 | -.356** | .507** | .549** |  |  |  |  |  |  |  |  |  |  |  |  |
| 29BO | .497** | .340** | .390** | .366** | .313** | .421** | .421** | .488** | .325** | .512** | .315** | .400** | -.043 | -.153** | .273** | .350** | -.060* | -.058* | -.122** |  |  |  |  |  |  |  |  |  |  |  |
| 2STS | .148** | .080** | .064* | .072* | .045 | .105** | .078** | .115** | .057* | .101** | .032 | .130** | .202** | .155** | .053 | .069* | .209** | .214** | .087** | .120** |  |  |  |  |  |  |  |  |  |  |
| 5STS | .031 | .056* | -.017 | -.059* | -.067* | -.074** | -.033 | -.008 | -.004 | -.044 | -.132** | -.007 | .287** | .260** | .046 | -.128** | .265** | .185** | .148** | .032 | .223** |  |  |  |  |  |  |  |  |  |
| 7STS | -.011 | .051 | -.076** | -.090** | -.089** | -.038 | -.049 | -.061* | .014 | -.068* | -.210** | -.044 | .463** | .399** | .034 | -.137** | .332** | .295** | .228** | .004 | .324** | .276** |  |  |  |  |  |  |  |  |
| 9STS | -.101** | -.059* | -.109** | -.190** | -.171** | -.143** | -.118** | -.107** | -.042 | -.166** | -.316** | -.141** | .579** | .541** | .023 | -.280** | .427** | .391** | .376** | -.049 | .244** | .290** | .466** |  |  |  |  |  |  |  |
| 11STS | -.200** | -.148** | -.236** | -.228** | -.274** | -.204** | -.220** | -.244** | -.116** | -.279** | -.405** | -.214** | .527** | .697** | -.032 | -.309** | .468** | .423** | .442** | -.075** | .195** | .283** | .473** | .631** |  |  |  |  |  |  |
| 13STS | -.108** | -.089** | -.104** | -.186** | -.202** | -.157** | -.171** | -.162** | -.124** | -.187** | -.329** | -.196** | .521** | .492** | -.020 | -.278** | .398** | .379** | .315** | -.044 | .186** | .260** | .418** | .600** | .586** |  |  |  |  |  |
| 14STS | -.101** | -.081** | -.118** | -.154** | -.168** | -.106** | -.112** | -.120** | -.072* | -.162** | -.305** | -.159** | .532** | .460** | -.008 | -.209** | .358** | .336** | .271** | -.033 | .204** | .259** | .382** | .541** | .501** | .702** |  |  |  |  |
| 23STS | -.136** | -.077** | -.200** | -.147** | -.185** | -.140** | -.125** | -.162** | -.089** | -.159** | -.296** | -.169** | .429** | .397** | -.038 | -.216** | .306** | .290** | .250** | -.093** | .156** | .244** | .311** | .427** | .427** | .460** | .485** |  |  |  |
| 25STS | -.197** | -.174** | -.187** | -.241** | -.223** | -.193** | -.178** | -.213** | -.109** | -.225** | -.392** | -.234** | .478** | .507** | -.102** | -.276** | .363** | .346** | .360** | -.094** | .136** | .239** | .322** | .482** | .566** | .525** | .526** | .563** |  |  |
| 28STS | -.080** | -.090** | -.071* | -.109** | -.128** | -.115** | -.093** | -.094** | -.014 | -.120** | -.168** | -.130** | .300** | .305** | .012 | -.166** | .211** | .201** | .221** | -.025 | .110** | .170** | .229** | .306** | .315** | .345** | .365** | .311** | .381** |  |
| *M* | 4.363 | 3.709 | 4.097 | 3.820 | 3.744 | 3.790 | 3.914 | 4.190 | 3.518 | 4.134 | 4.156 | 3.999 | 1.692 | 1.813 | 3.574 | 3.692 | 2.912 | 2.880 | 2.660 | 4.350 | 3.190 | 2.536 | 2.233 | 2.147 | 1.823 | 1.787 | 1.603 | 1.635 | 1.386 | 1.765 |
| *SD* | 0.678 | 0.945 | 0.909 | 0.891 | 0.909 | 0.848 | 0.904 | 0.830 | 0.996 | 0.929 | 0.770 | 0.836 | 0.891 | 1.001 | 1.282 | 0.915 | 1.104 | 1.131 | 1.248 | 0.723 | 1.103 | 1.061 | 1.030 | 0.952 | 0.950 | 0.874 | 0.815 | 0.879 | 0.732 | 0.911 |
